# Supplementary material
Source: PubMed Central journal article supplement (PMC9942312)
Supplement: 12913_2023_9128_MOESM1_ESM.pdf [file 12913_2023_9128_MOESM1_ESM.pdf]

Supplemental File. I-Lab interview guide

We would like to learn from each i-lab about their focus, purpose, and formation to identify common “themes” and unique aspects of the different labs including the membership structure and different levels at which we ask/expect stakeholders to engage and how this aligns with the lab’s purpose. We plan to use this data to produce a manuscript comparing I-Lab purposes and formation processes. Your responses will be collected as field notes in a REDCap form.

Please indicate your lab’s purpose or focus. [check all that apply, indicate which are primary focus]

|                                               |                                              |
|-----------------------------------------------|----------------------------------------------|
| <input type="checkbox"/> Cancer prevention    | <input type="checkbox"/> Equity              |
| <input type="checkbox"/> Cancer care          | <input type="checkbox"/> Quality improvement |
| <input type="checkbox"/> Survivorship         | <input type="checkbox"/> Innovation          |
| <input type="checkbox"/> Health policy        | <input type="checkbox"/> Other _____         |
| <input type="checkbox"/> Community engagement |                                              |

Is your I-lab built on an existing relationship (e.g., existing cancer network, hospital system or PBRN) or new relationships?

New: please describe \_\_\_\_\_

Existing: please describe \_\_\_\_\_

Tell us about how or what parts are new vs. existing?

Did the existing infrastructure have a research purpose or another purpose? Please describe

How do you define membership?

Is your I-Lab membership static or does the membership evolve over time (e.g., members coming and going)?

Briefly describe the activities of members in your lab:

In the prior Westat survey you listed [X] members or type of members [list members]

For each member or type of members, note whether they are new for this grant vs. established working relationships

| Member | Description of partnership with member: e.g., is it new for the grant or longstanding established research relationship |
|--------|-------------------------------------------------------------------------------------------------------------------------|
|        |                                                                                                                         |
|        |                                                                                                                         |
|        |                                                                                                                         |
|        |                                                                                                                         |

Do you have different categories of membership in your I-lab model? Y/N

If Y, how are the categories organized?

Probe:

- By type of organization (e.g., oncology, primary care, public health, CBO)
- By type of engagement (e.g., pilot study site, capacity building, CAB)
- Other \_\_\_\_\_

What aspects of your research do you plan to engage members in/have you engaged members in?

|                                                        | Primary care/FQHCs | Oncology, cancer centers | Hospitals and health systems | Public health, health departments | Community members & organizations | Other: _____ |
|--------------------------------------------------------|--------------------|--------------------------|------------------------------|-----------------------------------|-----------------------------------|--------------|
| Identifying research priorities                        |                    |                          |                              |                                   |                                   |              |
| Study planning                                         |                    |                          |                              |                                   |                                   |              |
| Study activities (e.g., data collection, study visits) |                    |                          |                              |                                   |                                   |              |
| Data analysis and interpretation                       |                    |                          |                              |                                   |                                   |              |
| Writing manuscripts/grants/other scholarly products    |                    |                          |                              |                                   |                                   |              |
| Dissemination of results                               |                    |                          |                              |                                   |                                   |              |
| Capacity building                                      |                    |                          |                              |                                   |                                   |              |

Has your I-lab design changed at all from what you initially proposed/planned? Y/N  
If yes, how, and why has it changed.

In what ways is your lab structured to address equity?

In what ways do your lab activities address equity?

How has your I-lab operationalized equity in your work?

Have your I-lab activities changed at all from what you initially proposed/planned? Y/N  
If yes, how, and why have they changed.

What methods/tools do you use to foster strong relationships with your lab members?

Where does your lab data come from?

|                                                     | Primary care/FQHCs | Oncology, cancer centers | Hospitals and health systems | Public health, health departments | Community members & organizations | Other: _____ |
|-----------------------------------------------------|--------------------|--------------------------|------------------------------|-----------------------------------|-----------------------------------|--------------|
| EHR data                                            |                    |                          |                              |                                   |                                   |              |
| Primary qualitative data                            |                    |                          |                              |                                   |                                   |              |
| Primary survey data                                 |                    |                          |                              |                                   |                                   |              |
| Shared data platform/ data reporting systems        |                    |                          |                              |                                   |                                   |              |
| Case management or other client management software |                    |                          |                              |                                   |                                   |              |
| Public health data systems                          |                    |                          |                              |                                   |                                   |              |
| Public use data                                     |                    |                          |                              |                                   |                                   |              |
| Other primary research data _____                   |                    |                          |                              |                                   |                                   |              |
| Other secondary data _____                          |                    |                          |                              |                                   |                                   |              |

What methods/formats do you use for engaging stakeholders in identifying research priorities?

|                                                      | Established method       | Newly created method     |
|------------------------------------------------------|--------------------------|--------------------------|
| Think tanks                                          | <input type="checkbox"/> | <input type="checkbox"/> |
| Workgroups                                           | <input type="checkbox"/> | <input type="checkbox"/> |
| Community engagement studios                         | <input type="checkbox"/> | <input type="checkbox"/> |
| Needs assessments                                    | <input type="checkbox"/> | <input type="checkbox"/> |
| Community coalitions                                 | <input type="checkbox"/> | <input type="checkbox"/> |
| Advisory boards                                      | <input type="checkbox"/> | <input type="checkbox"/> |
| Stakeholder interviews or focus groups               |                          |                          |
| Regular communications (scheduled calls or meetings) |                          |                          |

What methods/formats do you use or plan to use for engaging stakeholders in dissemination of results?

- Learning collaboratives
- Talks and community forums
- Publications
- Web-based formats/products
- Social media
- Other \_\_\_\_\_

Tell us a little bit about why you chose this/these method(s) for dissemination?
